# Supplementary material for: VAV2 signaling promotes regenerative proliferation in both cutaneous and head and neck squamous cell carcinoma
Source: PubMed Central journal article supplement (PMC7508832; doi:10.1038/s41467-020-18524-3), 2020-09-22
Supplement: 41467_2020_18524_MOESM1_ESM.pdf [file 41467_2020_18524_MOESM1_ESM.pdf]

Supplementary Information for

**VAV2 SIGNALING PROMOTES REGENERATIVE  
PROLIFERATION IN BOTH CUTANEOUS AND HEAD AND NECK  
SQUAMOUS CELL CARCINOMA**

by

Lorenzo-Martín *et al.*

This PDF file includes:

Supplementary Figures 1 to 9 and legends (pages 2 to 15)

Supplementary Tables 1 to 5 (page 16 to 26)

Supplementary Note 1 (page 27)

Supplementary References (page 28)

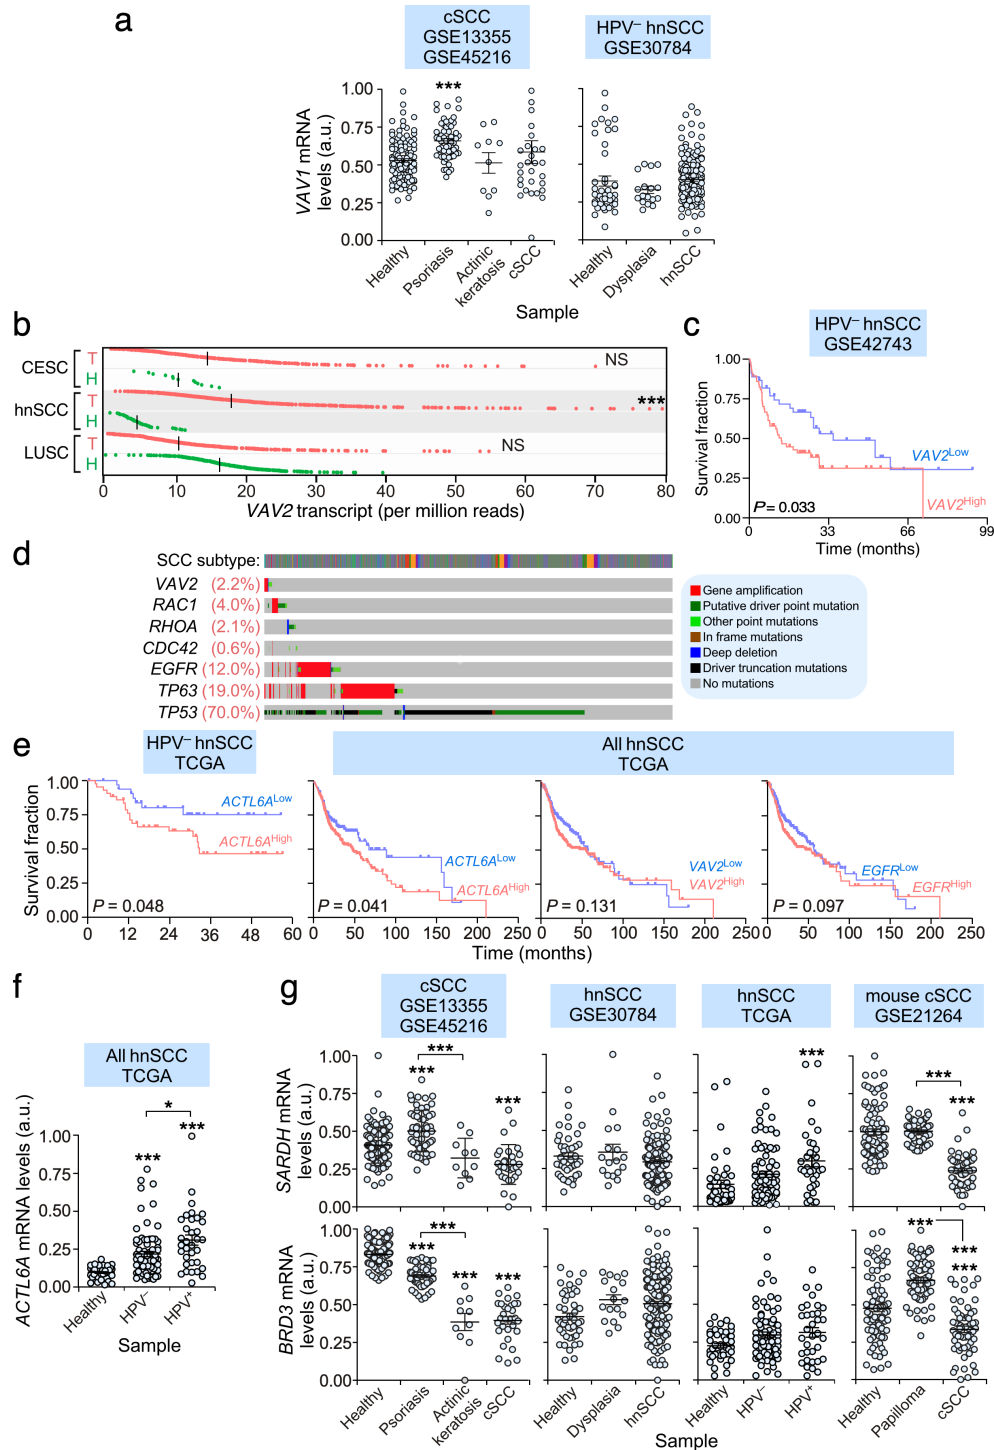

### SUPPLEMENTARY FIGURE 1. Increased abundance of VAV2 is associated with poor prognosis in SCC

(a) Dot plot showing the normalized expression of the *VAV1* mRNA in indicated hnSCC subtype patients (bottom). The gene expression dataset used for these experiments is shown at the top. \*\*\*,  $P < 0.0001$  (ANOVA and Tukey's HSD tests,  $n = 220$  and  $229$  patient samples, respectively).

- (b) Dot plot showing the *VAV2* mRNA abundance in healthy ( $n = 44$ ) and tumor samples ( $n = 519$ ) from the indicated cervical (CESC), head and neck, and lung (LUSC) squamous cell carcinoma TCGA datasets (left). \*\*\*,  $P < 0.0001$ . NS, not statistically significant (Student's  $t$ -test).
- (c) Survival of the hnSCC patients from the indicated datasets according to the abundance of the *VAV2* mRNA present in tumors. The Mantel-Cox test  $P$  value is indicated.
- (d) Genetic alterations found in the indicated genes (left) in human cSCC and hnSCC patients present in the cBioPortal database. The percentage of samples with gene alterations (in %) are indicated on the left in red.
- (e) Survival of the hnSCC patients from indicated datasets according to the abundance of *ACTL6A*, *VAV2* and *EGFR* mRNAs in tumors. The Mantel-Cox test  $P$  value is indicated for each transcript.
- (f) Dot plot showing the normalized expression of the *ACTL6A* transcript in indicated hnSCC subtype patients (bottom) according to HPV status. The gene expression dataset used for these experiments is shown at the top \*,  $P = 0.010$ ; \*\*\*,  $P < 0.0001$  (ANOVA and Tukey's HSD tests,  $n = 155$  patient samples).
- (g) Dot plots showing the normalized expression of the *SARDH* and *BRD3* mRNAs in indicated tissue samples (bottom) and gene expression datasets (top). \*\*\*,  $P < 0.0001$  (ANOVA and Tukey's HSD tests,  $n = 220, 229, 155$  and  $273$  patient samples, respectively).

In a, f and g, data represent the mean  $\pm$  SEM. Source data for this figure are provided as a Source Data file.

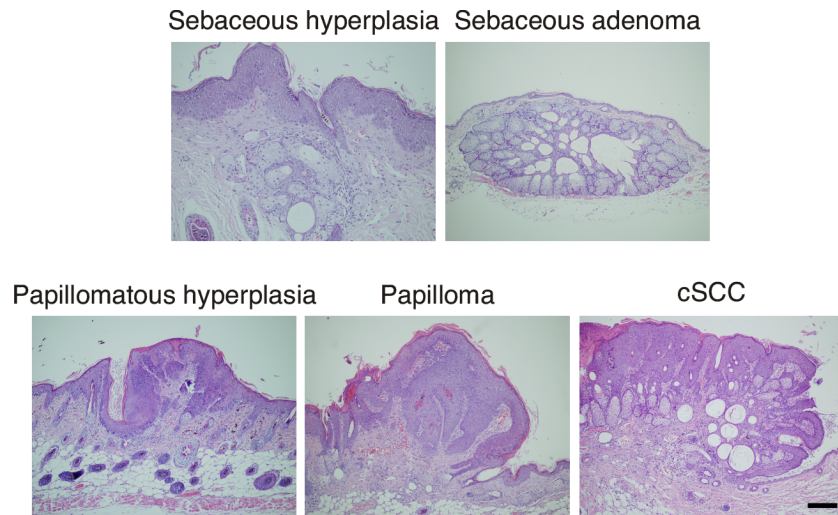

**SUPPLEMENTARY FIGURE 2.** Examples of the type of tumors detected in WT and *Vav2<sup>Onc</sup>* mice that have been used to generate the graphs shown in **Figure 3g**.  $n = 87$  independent stainings. Scale bar, 200  $\mu\text{m}$ .

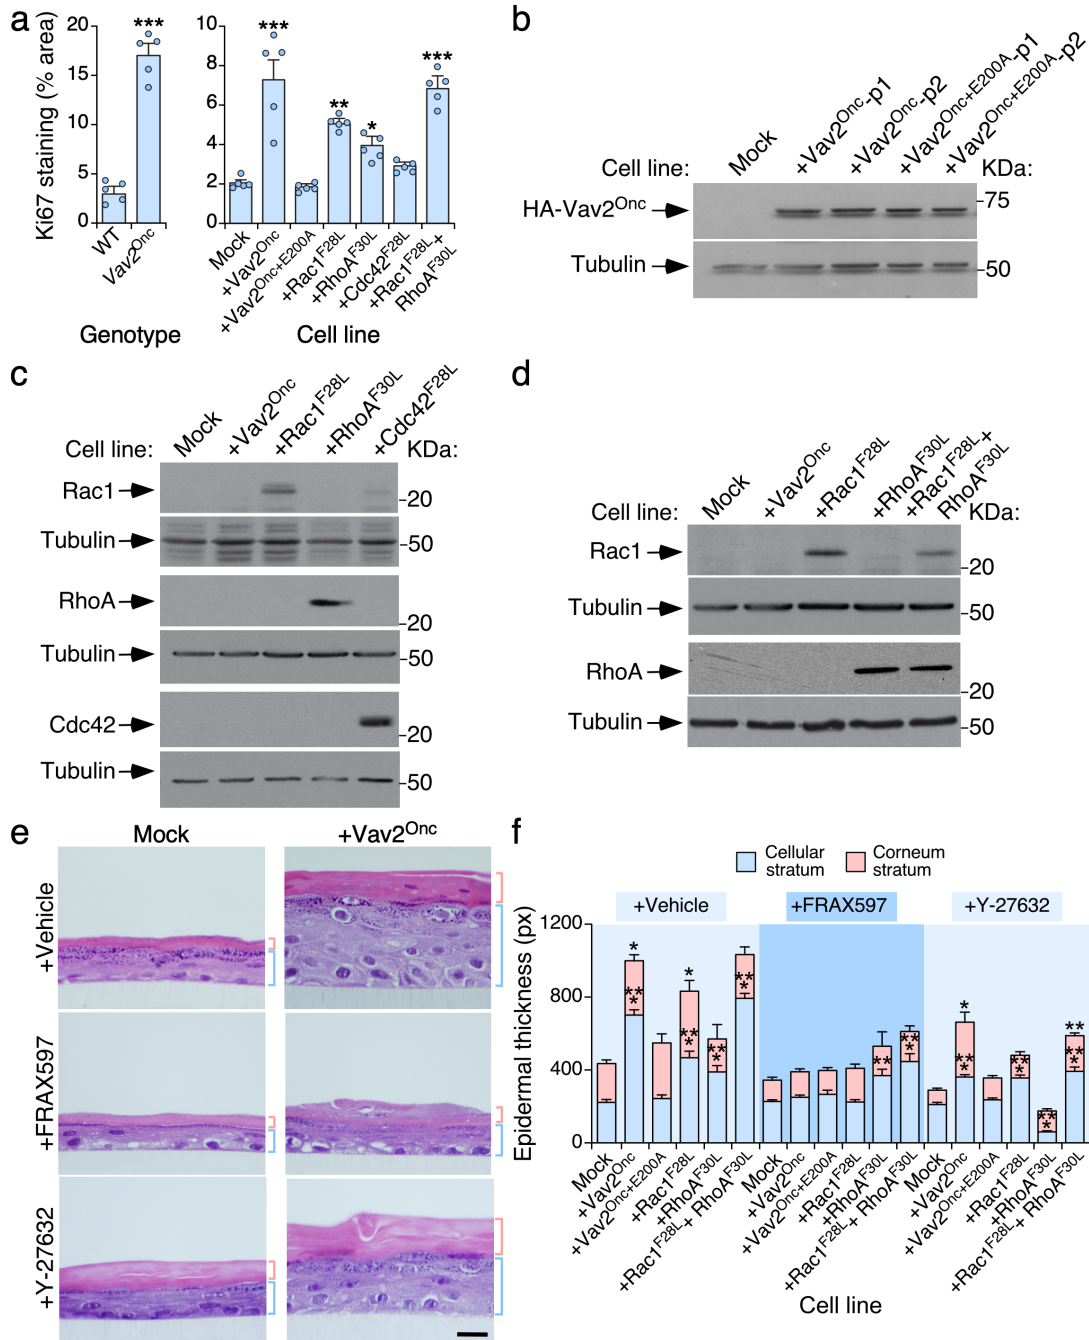

**SUPPLEMENTARY FIGURE 3 The effect of Vav2<sup>Onc</sup> in epidermis is both keratinocyte autonomous and catalysis-dependent**

(a) Quantification of the Ki67 immunoreactivity obtained in **Figures 4a** (left) and **4c** (right). \*,  $P = 0.012$ ; \*\*,  $P = 0.001$ ; \*\*\*,  $P < 0.0001$  (ANOVA and Dunnett's multiple comparison test,  $n = 5$  independent cultures).

(b, c and d) Immunoblots showing the expression of the indicated proteins in human keratinocytes. Tubulin was used as loading control in all cases ( $n = 3$  independent experiments). In B, p1 and p2 refer to two independent pools of cells.

(e) Representative images of hematoxylin-eosin-stained organotypic cultures generated by the indicated cells (top) and under the specified experimental conditions (left). The thickness of the corneum and cellular

epidermal strata is indicated with red and blue brackets, respectively. Scale bar, 10  $\mu\text{m}$  ( $n = 3$  independent cultures).

(f) Quantification of the thickness of the indicated skin strata according to the data obtained in panel e. px, pixel. \*,  $P = 0.041$  (Vav2<sup>Onc</sup>, vehicle, corneum stratum), 0.025 (Rac1<sup>F28L</sup>, vehicle, corneum stratum), 0.048 (Vav2<sup>Onc</sup>, Y-27632, corneum stratum); \*\*,  $P = 0.002$  (RhoA<sup>F30L</sup>, FRAX597, cellular stratum), 0.009 (Rac1<sup>F28L</sup>+RhoA<sup>F30L</sup>, FRAX597, corneum stratum); \*\*\*,  $P < 0.0001$  (all other tests) (ANOVA and Dunnett's multiple comparison test,  $n = 3$  independent cultures). In a and f, data are given as the mean  $\pm$  SEM.

Source data for this figure are provided as a Source Data file.

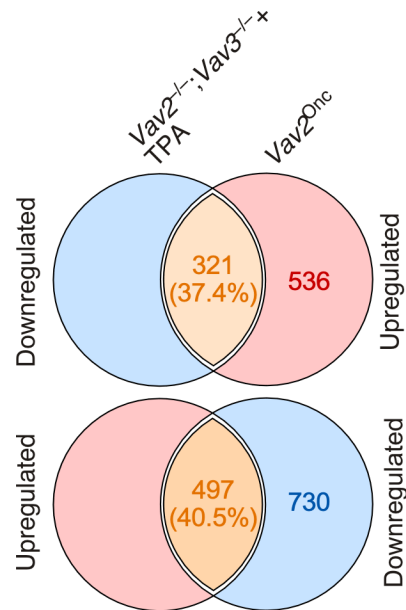

**SUPPLEMENTARY FIGURE 4. Vav2 controls a protumorigenic stem cell-like program in keratinocytes**

Venn diagram comparing the *Vav2<sup>Onc</sup>*-regulated transcriptome and the *Vav2;Vav3*-dependent fraction of the TPA-stimulated gene expression program in the skin of mice. The number of probesets and level of overlap are indicated.

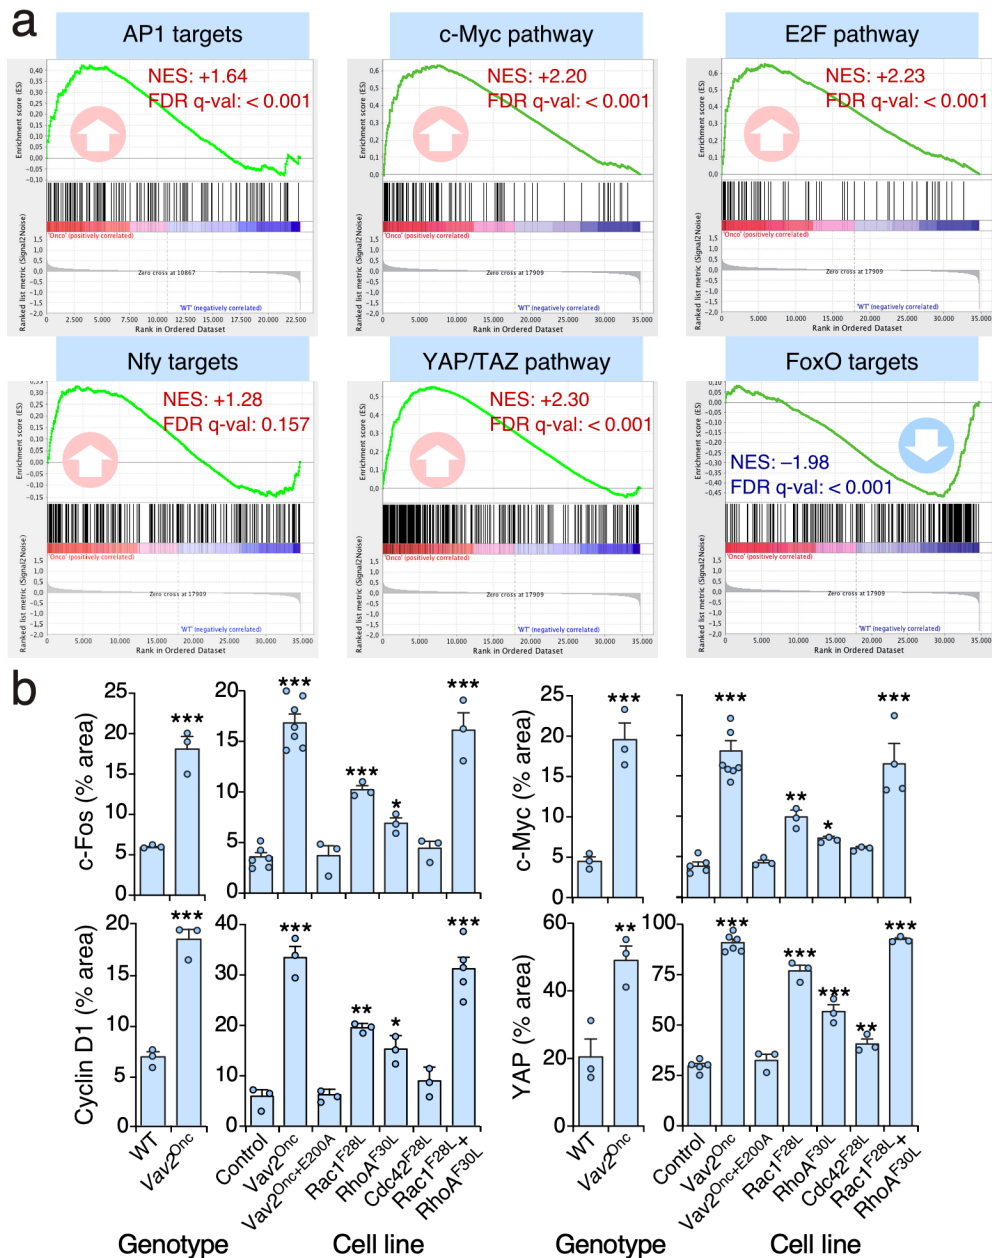

**SUPPLEMENTARY FIGURE 5. The *Vav2<sup>Onc</sup>*-dependent transcriptome is regulated by c-Myc, the YAP/WWTR1/TEAD complex, E2F, and AP1 factors**

(a) GSEA of the indicated transcriptional factor-associated gene targets in the *Vav2<sup>Onc</sup>*-dependent transcriptome. The NES (normalized enrichment score) and FDR (false discovery rate) values are indicated within each graph (GSEA statistical test). Positive and negative enrichments are indicated with upward- and downward-pointing arrows, respectively.

(b) Quantification of the immunoreactivity for the indicated proteins obtained in the experiments shown in Figure 6c,d. Data are given as the mean  $\pm$  SEM. \*,  $P = 0.017$  (RhoA<sup>F30L</sup> and c-Fos), 0.011 (RhoA<sup>F30L</sup> and c-Myc), 0.041 (RhoA<sup>F30L</sup> and Cyclin D1); \*\*,  $P = 0.003$  (Rac1<sup>F28L</sup> and c-Myc), 0.002 (Rac1<sup>F28L</sup> and Cyclin D1), 0.009 (Cdc42<sup>F28L</sup> and YAP); \*\*\*,  $P < 0.0001$  (all other tests) (ANOVA and Dunnett's multiple comparison tests).  $n = 3$  independent cultures.



Source data for this figure are provided as a Source Data file.

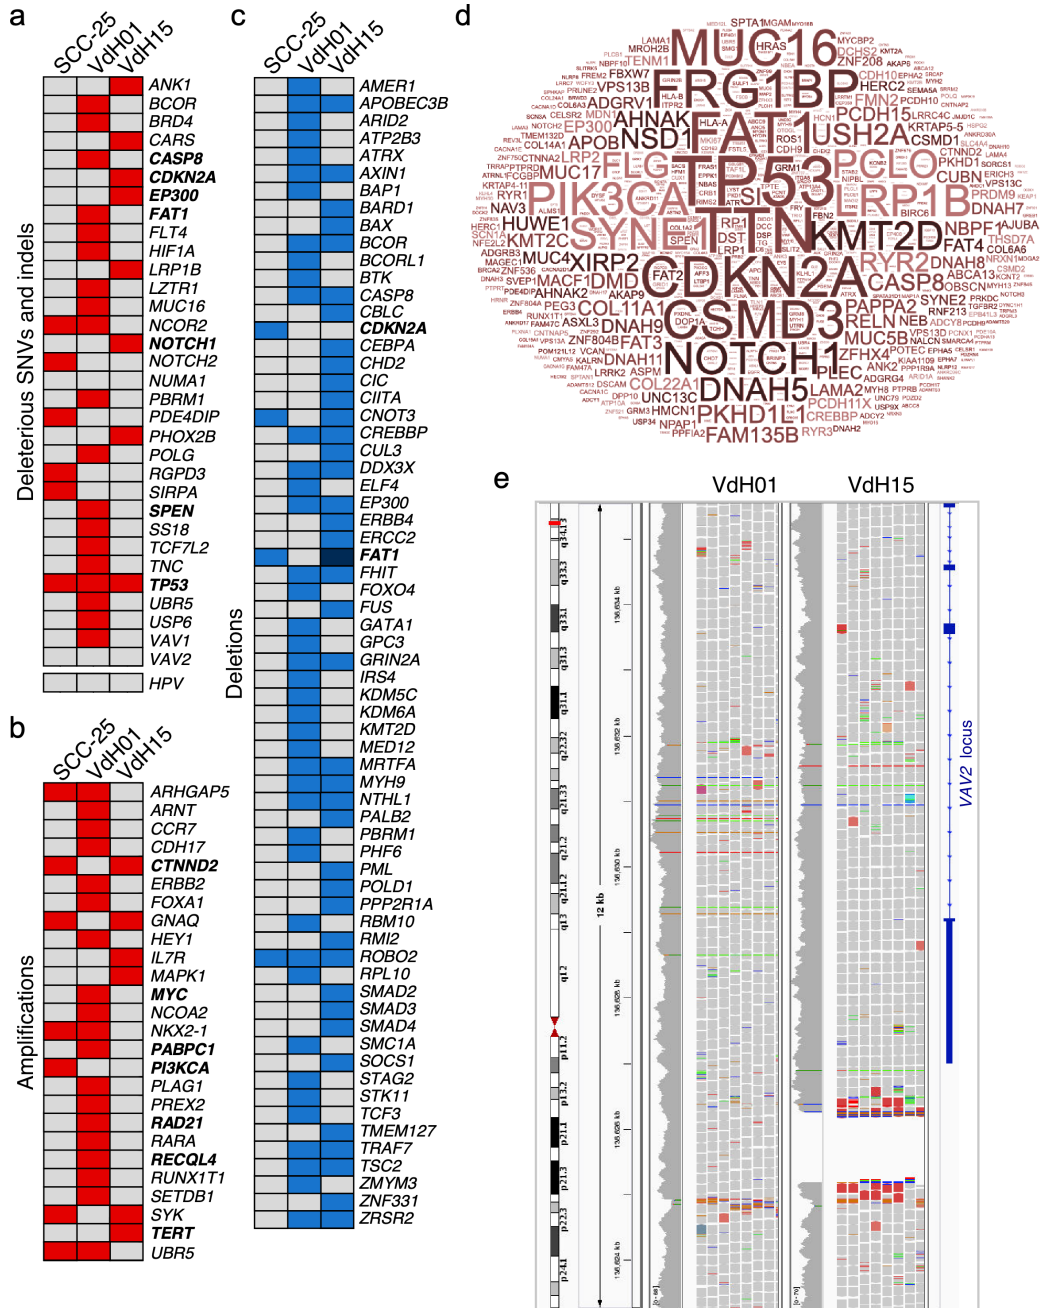

**SUPPLEMENTARY FIGURE 6. Characterization of the main genetic alterations found in VdH01 and VdH15 patient-derived cells.**

(a to c) Heatmaps showing the deleterious single nucleotide variants (SNVs) and indels (a, red boxes), amplifications (b, red boxes), and deletions (c, blue boxes) identified in the genome of the indicated cells (top). The data for the SCC-25 cell line have obtained from the Ref. #36 cited in the main text (Martín *et al.*, 2014). The genomic lesions that occur in at least 5% of hnSCC patients according to the TCGA dataset are highlighted in bold. In all cases, absence of mutations is depicted as a gray box.

- (d) Wordcloud representing the most frequently mutated genes in hnSCC patient samples according to the TCGA data. The size of each gene symbol is proportional to the mutation frequency of that gene in hnSCC.
- (e) Genomic view of the 3' genomic regions that is downstream of the *VAV2* gene in the indicated hnSCC patient-derived cell lines (top). From left to right, we show the chromosome map, the sequencing coverage, and the alignment of reads.

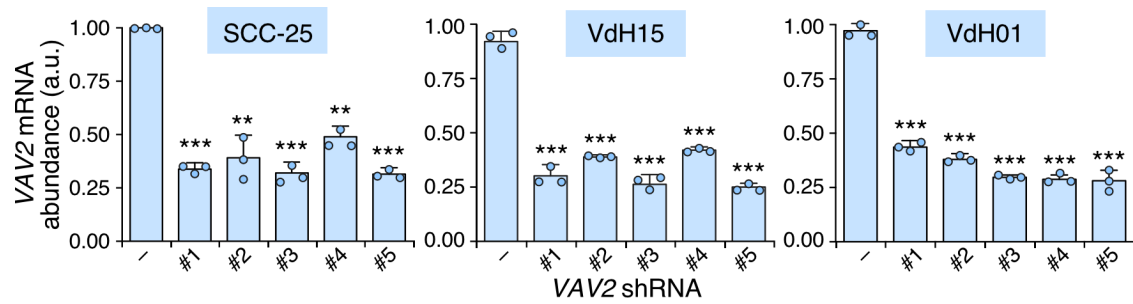

**SUPPLEMENTARY FIGURE 7. VAV2 downmodulation in human SCC patient-derived cells.** Level of *VAV2* mRNA knockdown achieved by the indicated *VAV2* shRNAs (bottom) in SCC-25, VdH15, and VdH01 cells. \*\*,  $P = 0.009$  (SCC-25 #2),  $0.007$  (SCC-25 #4); \*\*\*,  $P < 0.0001$  (all other tests) (ANOVA and Dunnett's multiple comparison test,  $n = 3$  independent experiments). Data are given as the mean  $\pm$  SEM.

Source data for this figure are provided as a Source Data file.

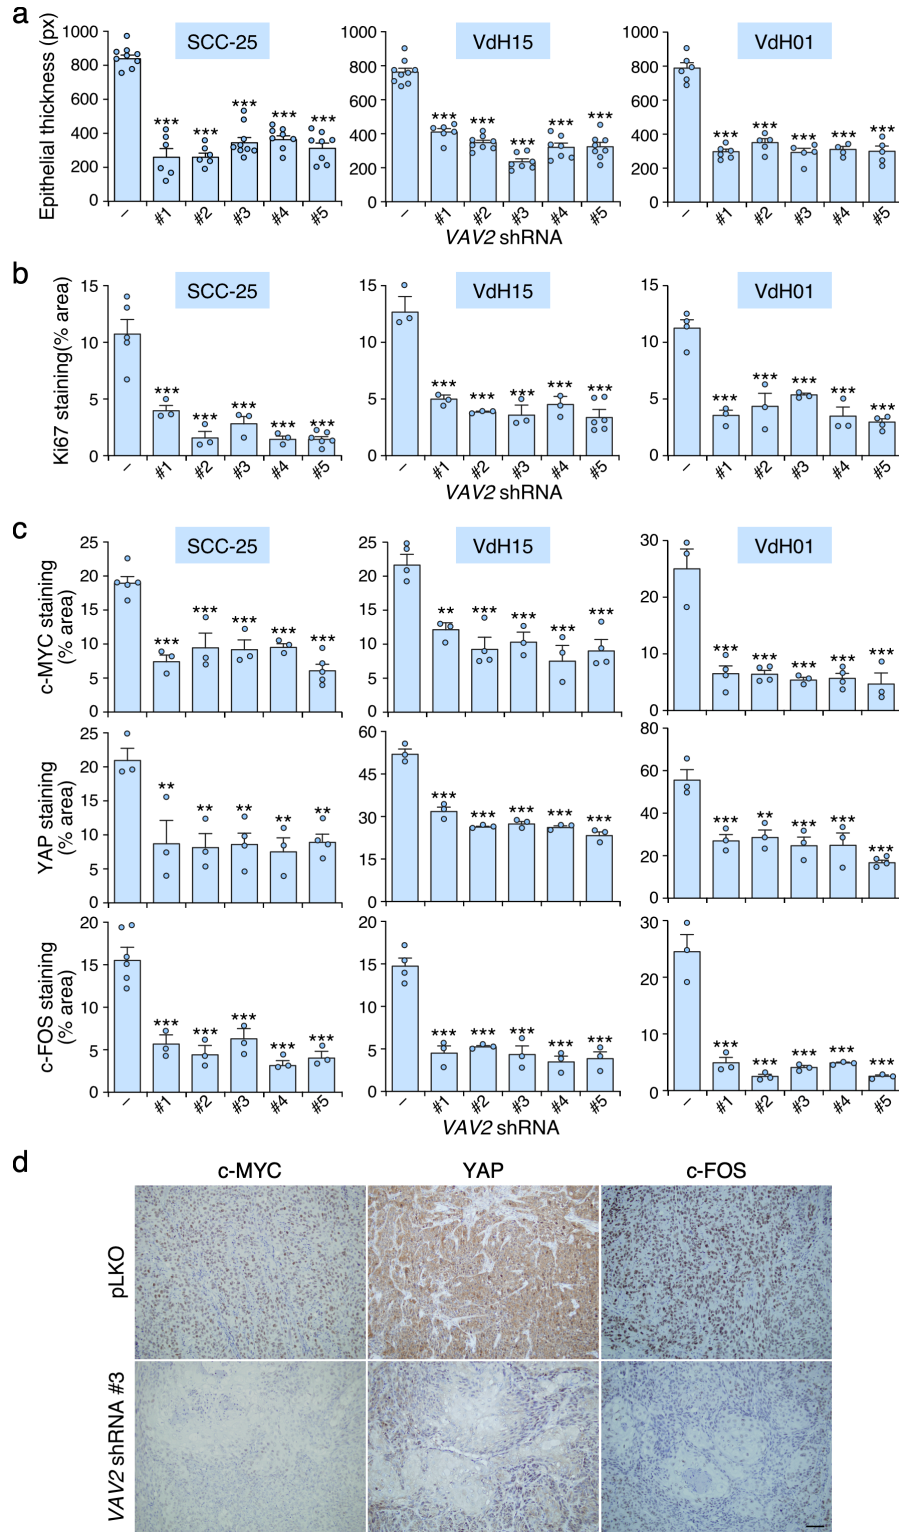

**SUPPLEMENTARY FIGURE 8. VAV2 downmodulation abrogates the tumorigenic potential of hnSCC patient-derived cells**

**(a and b)** Quantification of epithelial thickness (a) and Ki67 immunoreactivity (b) in the organotypic cultures displayed in **Figure 9a**. \*\*\*,  $P < 0.0001$  (two-sided Student's  $t$ -test).  $n = 5$  (a) and 3 (b) independent cultures. Data represent the mean  $\pm$  SEM.

**(c)** Quantification of the immunoreactivity for the indicated proteins (left) in the specified control and *VAV2* shRNA-knocked down cells (top). The *VAV2* shRNA used (#1 to #5) is indicated at the bottom. \*\*,  $P = 0.003$  (VdH15 #1, c-MYC), 0.009 (SCC-25 #1, YAP), 0.007 (SCC-25 #2, YAP), 0.001 (SCC-25 #3, YAP), 0.005 (SCC-25 #4, YAP), 0.001 (SCC-25 #5, YAP), 0.009 (VdH01 #2, YAP); \*\*\*,  $P < 0.0001$  (all other tests) (ANOVA and Dunnett's multiple comparison tests,  $n = 3$  independent cultures). In all panels, data are given as the mean  $\pm$  SEM.

**(d)** Lower magnification of the tumor sections shown in **Figure 9g**. Scale bar, 50  $\mu\text{m}$  ( $n = 8$ ).

Source data for this figure are provided as a Source Data file.

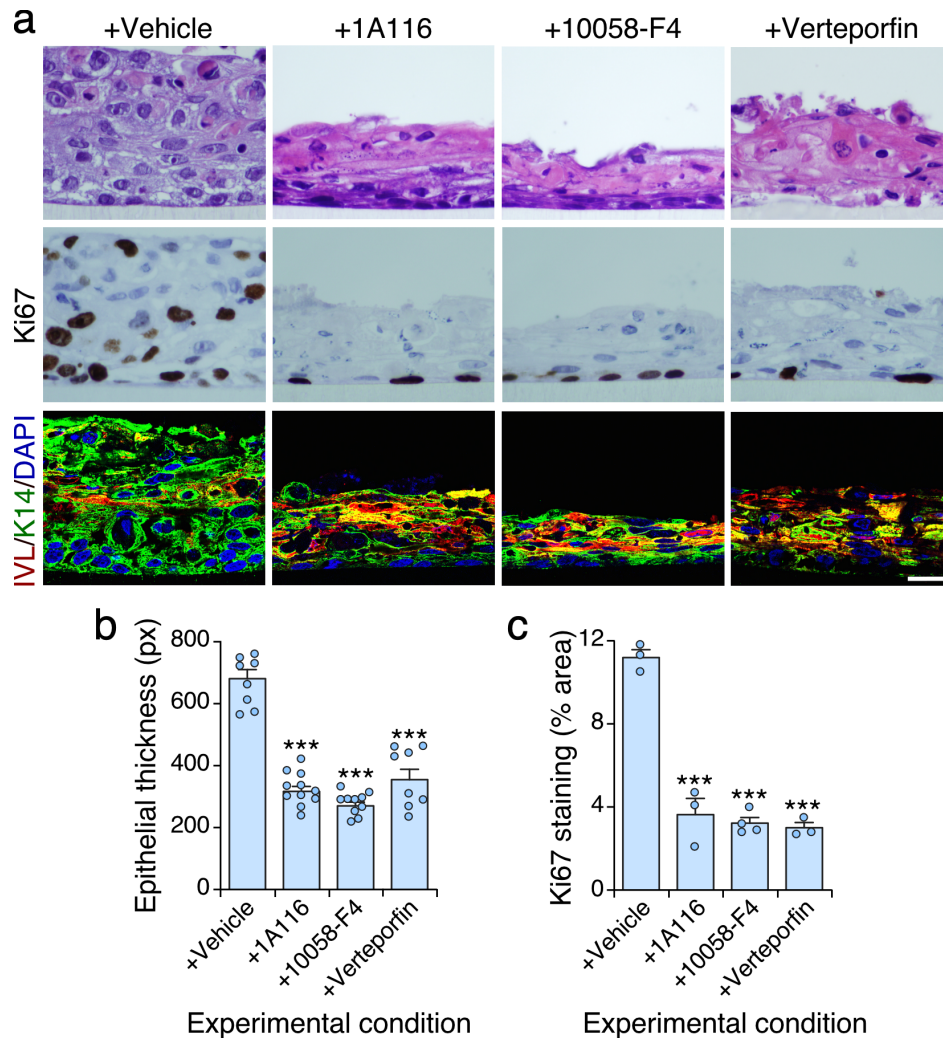

**SUPPLEMENTARY FIGURE 9. The impact of the depletion of endogenous VAV2 in oral SCC PDCs is mimicked by the chemical inhibition of endogenous RAC1, c-MYC and YAP/TEAD complexes**

**(a)** Representative images of organotypic cultures of parental VdH15 cells subjected to the indicated experimental conditions (top) upon staining with either hematoxylin-eosin (top panels) or antibodies to Ki67 (middle row of panels), IVL (bottom panels, red color) or K14 (bottom panels, green color). Some sections were counterstained with either hematoxylin (middle row of panels) or DAPI (bottom panels, blue color). Scale bar, 10  $\mu$ m ( $n = 3$  independent cultures).

**(b and c)** Quantification the epithelial thickness (b) and Ki67 immunoreactivity (c) obtained in the experiments shown in panel a. \*\*\*,  $P < 0.0001$  (ANOVA and Dunnett's multiple comparison test,  $n = 3$  independent cultures). In b and c, data are given as the mean  $\pm$  SEM.

Source data for this figure are provided as a Source Data file.

**SUPPLEMENTARY TABLE 1. Transcriptomic datasets used in this study**

| ACCESSION NUMBER    | REFERENCE                       | SPECIES | SITE          | SAMPLES | HEALTHY TISSUE | HPV STATUS          | SURVIVAL INFO  |
|---------------------|---------------------------------|---------|---------------|---------|----------------|---------------------|----------------|
| GSE21264            | PMID: 21244661                  | Mouse   | Skin          | 273     | Yes            | Not applicable      | No             |
| GSE13355 & GSE45216 | PMID: 19169254 & PMID: 24335922 | Human   | Skin          | 220     | Yes            | Not reported        | No             |
| GSE30784            | PMID: 18669583                  | Human   | Head and neck | 229     | Yes            | Not reported        | No             |
| GSE41613            | PMID: 23319825                  | Human   | Head and neck | 97      | No             | Negative            | Yes            |
| GSE42743            | PMID: 23319825                  | Human   | Head and neck | 103     | Yes            | Negative            | Yes            |
| TCGA HNSCC          | PMID: 25631445                  | Human   | Head and neck | 563     | Yes            | Positive & Negative | Yes            |
| TCGA LUSC           | PMID: 22960745                  | Human   | Lung          | 824     | Yes            | Not applicable      | Yes            |
| TCGA CESC           | PMID: 29625050                  | Human   | Cervix        | 319     | Yes            | Not applicable      | Yes            |
| GSE52651            | PMID: 25805135                  | Human   | Epidermis     | 21      | NA             | Not applicable      | Not applicable |
| GSE26713            | PMID: 21481790                  | Human   | T-ALL         | 124     | Yes            | Not applicable      | No             |
| GSE30219            | PMID: 23698379                  | Human   | Lung          | 307     | Yes            | Not applicable      | Yes            |



**SUPPLEMENTARY TABLE 2. Genes belonging to the Vav2<sup>Onc</sup> redundant and nonredundant transcriptomes relative to the Vav2+Vav3-dependent fraction of the TPA-stimulated gene program in the mouse skin**

| <b>REDUNDANT (Up in Vav2<sup>Onc</sup>)</b>                                                                                                                                                                                                                                                                                                                                                                                                                                                                                                                                                                                                                                                                                                                                                                                                                                                                                                                                                                                                                                                                                                                                                                                                                                                                                                                                                                                                                                                                                                                                                                                                                                                                                                                                                                                                                                                                                                                                                                                                                                                                                                                                                                                                                                                                                                                                                                                                                                              |
|------------------------------------------------------------------------------------------------------------------------------------------------------------------------------------------------------------------------------------------------------------------------------------------------------------------------------------------------------------------------------------------------------------------------------------------------------------------------------------------------------------------------------------------------------------------------------------------------------------------------------------------------------------------------------------------------------------------------------------------------------------------------------------------------------------------------------------------------------------------------------------------------------------------------------------------------------------------------------------------------------------------------------------------------------------------------------------------------------------------------------------------------------------------------------------------------------------------------------------------------------------------------------------------------------------------------------------------------------------------------------------------------------------------------------------------------------------------------------------------------------------------------------------------------------------------------------------------------------------------------------------------------------------------------------------------------------------------------------------------------------------------------------------------------------------------------------------------------------------------------------------------------------------------------------------------------------------------------------------------------------------------------------------------------------------------------------------------------------------------------------------------------------------------------------------------------------------------------------------------------------------------------------------------------------------------------------------------------------------------------------------------------------------------------------------------------------------------------------------------|
| <p><i>Cenpn, NA, Gas5, Pdap1, Pitrm1, Cdc20, Fam162a, Kpna2, Hmgb3, Cct3, Tmem97, Hist1h4c, Itgb4, Hist1h2bh, Prmt1, Rpl38, Urah, Gnl3, Mcm3, Nop56, Hmgb2, Ftsj3, Ahsa1, Ddx21, Lbr, Mybl2, Dsg3, NA, Mthfd11, Hist1h2be, Cct5, Ppm1g, Hist1h4m, Snrpf, Nt5dc2, Hmgb1, Rps8, Slc7a5, Tk1, Cenpm, Eef1e1, Srm, Rrm2, Nup93, Snord16a, NA, Aurkb, Fbl, Noc2l, Alyref, Rcc1, 2610528A11Rik, Myo10, Stom, Paklip1, Trip13, Erh, Nek2, Hmgb2, Gm3893, Mcm10, Snrpg, Myc, Rpl38, Hmgb1, Srsf9, Gm2173, Gm3696, Hspe1, Snrpd1, Hmgb1, Ccnel, Hmgb1, Nudc, Aurka, Hmgb1, Pla2g4c, Cdca5, Hnrnpa3, 4933409K07Rik, Ppih, Tmem97, Cks2, Rps12, Rplp1, Ndc80, Mki67ip, Myl4, Hist1h2ao, Rpl24, Cdk1, Snora62, Ranbp1, Cdca8, Wdr12, Ldlr, Mlana, Mybbp1a, Hmgb1, Hist1h2br, Myh9, Hist1h4h, Enah, Kif22, Col18a1, Rad51ap1, Sprr1b, Hyal1, Ldlrap1, Cad, Cks1b, Birc5, 9430008C03Rik, Rnu12, Snora74a, H2afx, Nup43, Orcl, Rcl1, Kpna2, Itgb1, Tars, Incenp, NA, Hmgb2, Exosc2, Duox1, Impdh2, Heatr1, Serpinb6c, Gas5, Ass1, Ube2s, Mcoln3, Hist1h2ab, Rpl12, Wfdc12, Hmgn2, Hist1h4b, 9430008C03Rik, Hmgb1, Hmgb1, Ppan, Nop16, Bnc1, Grwd1, Has3, Bcl2l15, Nrp2, Larp4, Snora33, Itga3, Nolc1, 4933409K07Rik, Pmel, Mtl, Scd2, Lrp8, Itpa, Rnu3b1, Myh9, Hirip3, Slc24a5, Ppil1, Slc45a2, Lmnb1, Gm3002, Ccnd1, Snora61, Polal, Gm5416, Cth, Slc20a1, Snora65, Ube2s, Ctps, Fhl2, Col12a1, Timm8a1, Adamts1, E2f7, Ptpz1, S100a6, Serpina9, Hnrnpa3, Pil5, Npm3, Timm8a1, Vaultrc5, Fscn1, Idi1, Erh, Lcn2, Dusp6, Mthfd2, Odc1, Hist2h2ab, Mrto4, Hmgb1, Snord53, Tnfrsf12a, Ccdc86, Junb, Tslp, NA, Fen1, Gjb6, Etv4, Krt35, Bcl3, Tubb6, Gsta4, Beat1, Gjb2, S100a8, S100a9, Odc1, Lipg, Gsr, Hbegf, Hp, Akr1b8, Il33, Ahcy, Dct, Cxcr2, Snord15a, Tyr, Ngf, Rps27a, Ccnblip1, Snord49a, Krt85, Itga5, Socs3, Mrto4, Smim3, Procr, Snora31, Tnc, Slc7a11, Rnu73b, Wif1, Fosl1, Gm5483, Rnu3a, 4933409K07Rik, 5730408K05Rik, Hist1h3g, Clcf1, Fbp1, Defb14, Phlda1, Lamc2, Krt28, Sh2d5, Tubb3, Tyrp1, Saa3, Cdhr1, Cntfr, Pdpn, Saa2, Ms4a4c, Lrat, Areg, 4933409K07Rik, Mmp9, Sirpb1b, Rnu1b1, Nrg1, Slc39a14, Slpi, Krt73, Inhba, Plek, Gm5150, Serpinel, Fam26d, Ifitm1, Timp1, Ptgs2, Trem3, Mmp13, Slc2a3, Ifitm1, Krt31, Epgn, Cyp4f18, Osm, Ifi202b, Krt33a, S100a3, NA, Krtap11-1, Mmp1b, Plaur, Hdc, Krt27, Krtap19-5, Krt71, Upp1, Ccl4, Krt25, Slfn4, Il1b, Prg4, Krtap19-1, Cd14, Spatc1, Nlrp3, Ccl3, Selp, Spp1, Trem1, Krtap15, Clec4d, Il24, Irg1, Cxcl2, Clec4e, Il6</i></p> |
| <b>REDUNDANT (Down in Vav2<sup>Onc</sup>)</b>                                                                                                                                                                                                                                                                                                                                                                                                                                                                                                                                                                                                                                                                                                                                                                                                                                                                                                                                                                                                                                                                                                                                                                                                                                                                                                                                                                                                                                                                                                                                                                                                                                                                                                                                                                                                                                                                                                                                                                                                                                                                                                                                                                                                                                                                                                                                                                                                                                            |
| <p><i>Skint9, Skint10, H2-T22, Krt77, Ankrd35, Inmt, Skint11, H2-Q6, Cyp2g1, Sema3d, Clca1, Serpina3b, Alox12e, Skint4, Il22ra2, Serpinb7, Bbox1, Trdn, Il20ra, Clca2, Agbl1, Ucp3, Abca5, Cacna1s, Xirp2, Tcrg-V1, Pkia, Irf4, Scd3, NA, Mettl21c, Mlfl, Mstn, Mmp27, Oas1f, Trgv2, Uprr, H2-Ab1, Myh2, Ampd1, Scn2a1, Myom1, Asb12, Ccr4, Skint7, Flg2, Wnt3, Slc2a12, Ecm2, Skint2, Sbk2, Calm5, Klhl31, Myo18b, Lipn, Ereg, Tmod4, Kcnj2, Myoz1, Filip1l, Scn2a1, 2300005B03Rik, Smyd1, Mrgprb2, Clca3, Chit1, Mybpcl, Lcelm, Fbxo32, Skint3, Cmb1, 9430007A20Rik, Ccdc3, Txlnb, Cyp2b19, Xkrx, Fsd2, Slc5a9, Pdk4, Krt78, Serpinb12, Tmem182, Aloxe3, H19, Casq1, Il20rb, Slurp1, Dab1, Sgcd, Lcel1a2, Zfp943, Ttn, Trim7, Lce6a, Myot, H2-Eb1, Serpina12, Ppp2r3a, Trdn, Klhl38, H2-M2, Clca5, Tmem159, Otop3, Slc15a2, Mill1, Lrrc39, Satb1, Ckmt2, Neb, Ikzf2, Gal3st4, P2ry4, Tgfb2, Cd55, Slc16a14, Adh6a, Exph5, Srl, Lcel1, 9530053A07Rik, Sypl2, Lceli, Osr2, Myom3, Ctnb2, Pcmt1d, Ear2, Lcel1f, Myh1, A930018M24Rik, Ogn, Slc24a3, Pdk2, Lor, Gdgd2, Lcel1d, Pygm, C4b, Sh3rf2, Klhl31, Atp1b1, Lrrc28, Il20rb, Lmod2, Hal, Fndc1, Lipk, Cpxm2, Them5, Adck3, Fmo2, Acvr1c, H2-Aa, Sox6, Rblcl1, B3galt2, Il12rb2, Zbtb16, Cilp, Pou2f3, Mfap4, Lipm, Cobl, Map2, Lcelg, Fam214a, Mettl7a1, Nr1d1, Plekhn1, Thrb, Lmod3, Gm7165, Krt15, Ccl27a, 2310014L17Rik, Slc28a3, Klhl24, Fndc9, Gm11992, Gpld1, Il1f8, Fitm1, Il20rb, Krt10, Aif1l, Rps6ka6, Mrgprb3, Smpd3, Nipal2, Fam189a2, Slitrk6, Il1f6, Gm7609, Tmem229b, Tstd2, Atp1a2, Tmprss11f, Calcb, Nt5c3, Cyp27a1, Ear5, Plb1, Kcnj16, Acot2, Myom2, C6, Cyp2f2, Rora, Gm5105, Nrap, Serpinb11, Ar, Gpr111, Sh3gl2, 2310007B03Rik, Cyp2r1,</i></p>                                                                                                                                                                                                                                                                                                                                                                                                                                                                                                                                                                                                                                                                                                                                                                  |

*Tjp3, A030009H04Rik, Atp10b, Lrrc61, Gramd1c, Slc6a4, Fam3b, Scara5, Eps813, Slco2b1, Pck1, H2-DMa, Lce1c, Cyp2j9, Eps811, Alox12, Maob, Actn2, Rasgrp1, Aldh1a7, Clec3b, Hyal4, ago-04, Dlc1, Ccl19, Ano9, Retnla, Cpt1b, Krt23, Calcoco1, Papl, Trp53inp1, Dapp1, Slc34a2, Fam134b, Kctd4, Hhatl, Serpinb8, Mettl7a3, Il1f5, Acpp, Orm1, Dapl1, NA, Myoz2, Kprp, Opcml, Aldh1a1, Nkg7, Cyp2j6, Tmem229b, Asah2, Nccrp1, Pkib, Cdo1, Rnf167, Slc22a4, Myo6, Gata6, Gyg, Hmgcs2, Atp6v1c2, Hspb6, Calm4, Gpcpd1, Yod1, Mboat2, Olah, Frmpd1, Gba2, Adh1, Tprg, Ggct, Apobec2, Asb2, Ssbp2, Pcolce2, Acss1, Anxa9, Il18, Arhgap40, Sgpp1, Liph, Ahnak2, Sema3c, Ptgs1, Kdm6a, Pnpla3, Cpa4, Esys3, Slco3a1, Nlrp10, Gsdma2, Cpm, Scgb1b27, Pcmd2, Arhgef37, Coro2b, Arhgap20, Arrdc3, Slc36a2, Leprell, Gprin2, Tppp, H19, Rnase1, Cox6a2, Fxyd1, Fmo5, Myo18b, Unc93a, Adamts14, Dkk1, Cd109, Car14, Casp14, Gpc6, Scel, Abca6, Mup3, Acsbg1, H2-DMb2, Mpz, Mfap2, Fyco1, Lce1b, Cd3e, Slc46a2, Faah, Dnase112, Slc16a9, Esr1, Hbp1, Sdcbp2, Glcci1, Slc25a12, Elmod1, Chga, Hsd17b14, Gzmc, Susd2, Ciita, Dlg2, Ezh1, Cgn, Gpr115, Plekha5, Oxtr, Atg13, Foxn3, Klk11, Gprc5c, Trp53inp2, Ccl17, Pof1b, Plcx2, Gan, Ldb3, Itm2a, 2310042D19Rik, Adssl1, A530099J19Rik, Ttc28, Hrrnr, A530016L24Rik, Agpat5, Zfand6, Ascl2, Cat, Camsap3, Acer2, Abca9, S1pr5, Ak1, Inpp5k, Ptpn14, Tppp3, Fcho1, Ypel2, Aff3, Cd74, Bmp2, Gpd1, Lrrn4cl, Dyrk1b, Lnx1, Arhgef5, Ivl, Galnt15, Plxdc2, Abcc5, Nuak1, Hoxa9, Hoxa1, Nlrc5, Slc31a2, Rgmb, Slc43a1, Ephx3, Slc15a1, Gmpr, Pink1, Card14, Slc37a2, Nnt, Cdon, Tob1, Plb1, Tcea3, Hiatl1, Lce1h, Sft2d2, Acs11, Slc27a1, Akr1c14, Gsdma, Abca12, Pdzk1ip1, Gjb5, Nlrc5, Mr1, Crebrf, Camk1d, Cited2, Npy1r, Rbp4, Ivd, Atp12a, Gdpd3, Klf9, Nqo2, Alox12b, Nrd1, Plb1, Ust, Txnip, Ctnnbip1, Dhrr3, Mfap3l, Slc22a5, Adam23, Nebl, Tnxb, Sgpl1, Prss8, Acadm, Mup6, Sik1, Pik3cb, Efn3, sept-03, Tspan5, Bpifc, Sntb1, Itfg3, Hmcn1, Mid2, Dexi, Slc46a3, Dpp4, Tmprss4, Atg9b, Reck, Slc9a9, Fut2, Agpat4, Pepd, Cd59a, Ppl, Sdr9c7, Slc26a9, Cul3, Hfe2, Tmem170, Adamts11, Myzap, Timp3, Spon2, Dennd1b, Klk9*

#### NON-REDUNDANT (Up in Vav2<sup>Onc</sup>)

*BC018473, Defb8, Snora20, Actn3, Gas5, BC117090, Myh4, Prss35, Acsm3, Cyp3a57, Uty, Fut11, Echdc1, Tmem56, Krt24, Acox1, Snhg1, Pank1, Acacb, A130014H13Rik, Ppia, Stfa3, Cenpk, Tbrg3, Pdss1, Glo1, Sdr16c6, Ect2, Hmgbl, Depdc1a, Serpinb3b, Glo1, Igf13, Atad5, Ptlb, 4933409K07Rik, Hmgbl, Elovl6, Cenpw, Hmgbl, Secisbp2l, Hells, Ddx3y, Hsp90aa1, Rps3a1, Kif23, Acot5, Chek1, Cthrc1, Eif2s3y, Gins1, Npm1, Hmnr, Hspd1, Sc4mol, Hist2h2aa1, Stfa211, Hmgbl, Smc4, Dhcr24, Kdm5d, Bub1, Paxbp1, Soat1, Fa2h, 4930422G04Rik, Gm3579, Tlcd2, Rbmxl1, Stil, Taf1d, Wdr76, Idi1, Far2, Slc25a48, Zwilch, Hmgbl, Brca1, Atad2, Myh3, Sgol1, NA, Hist2h3c1, Nucks1, Hnrnpa3, Mad211, Elovl3, NA, Ptch1, Rps12, Rs5-8s1, Hmgbl, Casc5, Dtl, Arntl2, Prim1, Diap3, Ncapg2, NA, Kif15, Naa50, Snrpe, Dnaja1, Gen1, Kif14, Supt16, Mki67, Cspp1, Tcp1, Taf1d, NA, NA, Spata5, Anp32b, Rbl1, Chaf1b, Plxnb1, Hmgbl, Rps4x, Gm13178, Cenph, 2210404J11Rik, Snora30, Ncapg, Parpbp, C330027C09Rik, Ccn1, G2e3, Hspd1, Cdca7l, Rpl38, Ptges3, Ces4a, Kif11, Hmgbl, Ankrd1, Naa25, NA, Mis18bp1, Hmgbl, Esco2, NA, Nusap1, Hist2h2aa1, Kif20b, NA, Pcn, Hnrnpd, Ccnb2, Cyp51, Syncrip, Ppih, NA, NA, NA, Eif2s1, Lss, Srsf1, Hmgbl, Hnrnpu, Rbm25, Hat1, Srsf10, Cenpa, Snora23, Rps25, Srsf7, Dimt1, Rps4x, Hmgcr, Topbp1, Dnajc9, Bora, Cbx3, NA, Awat1, Top2a, Wdhd1, Hmgbl, Npm1, Hist2h2bb, Tk1, Anln, Hsp90aa1, Mcm2, Rps12, Snord35a, Rbm25, Fam60a, Prr11, Racgap1, Pole, Tfap2a, Ticrr, Dgat2l6, Hist2h2aa1, Taf1d, Hmgbl, Ccna2, Sgol2, Hmgbl, Spag5, Knic1, Xpot, Dlgap5, Snora69, Hmg11, Nudt5, 2410002F23Rik, Smc2, Dctd, Kif18a, Fbxo5, Hmgbl, Gyk, Smarcc1, NA, Hnrnpc, 2010107E04Rik, Snord42b, Ttk, Cdca7, Hist1h3g, Hist2h2aa1, Ptch2, Fancd2, Ptma, Tcerg1, 2810417H13Rik, Hist3h2a, Mat2a, BC100530, Suz12, Gylt1b, Hist1h3d, Cbx3, Hist2h4, Actc1, Mfsd2a, Gm16494, NA, Hist1h2an, Nasp, Gpnmb, Hmgbl, Lap3, Till4, Ncapd2, Taf15, Hmgn2, Rps27a, Fabp5, Far1, Dkc1, Psma5, Hnrnpa2b1, Rrm1, Malat1, Snhg5, Dhfr, Mms22l, Rrp1b, Npm1, Pcnp, Rps12, Srsf5, Rpl13, Taf4b, Pold3, Npm1, Itga6, Cd44, Hmgbl, Shmt2, Bdh1, Shcgp1, Eif3a, Ska3, Hspa14, Gm5803, Rps12, NA, Syne2, Slc2a1, Pctp, Hist1h1a, Hmgbl, Snord82, Nup155, Cenpq, Gtf2ird1, Stmn1, Kpna2, Fabp5, Gm5643, Sumo3, Eif4a1, Eno1, NA, Hnrnpa3, Clcn6, Hnrnpa3, Hist2h3b, Kif20a, Blm, Depdc1a, Dnmt1, Krt6b, Hist1h2ao, Ppia, Brca2, Hist1h3a, Arhgap11a, Ptma, Stfa1, 2810417H13Rik, Cbx3, Snord14d, Rps8, Gm5478, Abhd1, NA, Rrs1, Prim2, Rpl24, NA, Mtbp, NA, Taf1d, NA, Prcl, Shfm1, Ccne2, H2afz, Uhrf1, Taf9, Hist1h2ao, Gli1, Ilf2, Plk4, Rps3a1, Nme2, Hnrnpab, Cdkn3, Snhg1, Tpm4, Hist1h3f, Rps4x, Mak16, Tyms, Pa2g4, Snora3, Rangap1, Hmgbl, Cdk2, Cenpe, Hist1h3f, Snord14d, Rps4x, D17H6S56E-5, Rps8, Kif4, Nop58, Rps27a, Anxa2, Bub1b,*

*Hist1h2ak, Fam60a, Set, Mcm7, Hspa9, Snhg1, Kif2c, Hist1h2br, Rps9, Hist1h2bc, Kcnk1, Mcm5, Hint1, Hist4h4, Tagln2, Gm10052, Hist1h2br, Hist1h4d, Lrrc59, Hnrnpf, Cdc25c, Hist1h4b, Whsc1, Pcn, Mcm6, Lig1, Ube2i, Rad51, Cdca3, Mcts2, Mcm4, Hist1h4f, Syce2, Atp1a1, Nup107, Snrpa1, Shmt1, Rps29, H2afz, Hist1h2af, Dbf4, Ncl, Hist1h2ao, Hist1h3g, Dhx9, Ccnb1, Aqp3, Smpdl3b, Rps3a1, Ppa1, Rps8, Hist1h1b, Tnnt2, Ppih, Rbmxl1, Fanca, Hmgb3, Igsf3, Mt2, Nop10, Hmgb1, Ahcy, E2f3, Pola2, Srsf5, Hist1h2ao, Hsp90aa1, Gart, Tubb5, Slc39a10, Mycn, Nars, Cdt1, S100a14, Ccnb1, Ncaph, Hmgn2, Tnni1, Fus, Hist1h4n, Ran, Eif2s2, Rpl24, Snora52, Itpa, Mlflip, Nhp2, Kcnh1, Hist1h4b, Rpl38, Set, Anp32e, Rps12, Gnl2, Krt16, Snrnp70, Suv39h1, Rps12, Uqcr11, Ptma, E2f8, Hnrnpa1, Tpx2, Hist1h2br, Erdr1, Cdh3, Pbk, Ccnb1, Cdc25a, Hnrnpf, Snora3, Taf1d, Nup133, Scarna17, Rps27a, Knstrn, Tacc3, Snrpg, Kpnb1, Slc7a1, Asf1b, Hist1h2ap, Cks2, Taf1d, Lama5, C1qbp, NA, Ndc1, Hist1h2bm, Pold2, Rps29, Wdr43, Rps29, Mapk6, Ass1, Gm3579, Impdh2, Porcn, Rpl15, Sfn, Rn4.5s, Rps29, Ube2i, Foxm1, Sfn, NA, Plk1, Pla2g4e, Exo1, Pfas, Dgat1, Acta2, Ssrp1, Hif1a, Hsp1, Cep55, Nudc, Cirh1a, Rps27a, Defb3, Hmgb2, Ifrd2, Chaf1a, Kif18b, Snrpd3, Hnrnpa3, Krt6a, Cks2, Hist1h2bb, Glt1d1*

**NON-REDUNDANT (Down in Vav2<sup>Onc</sup>)**

*4833423E24Rik, Sort1, Spns2, Zdhc9, Chp2, Nfatc2, F830045P16Rik, Ide, Mfge8, Arhgef5, Lpcat2, Slc6a20a, Blnk, Slc40a1, Il34, Mcc, Zbtb20, Fgf22, Cyp2b10, Efh1, Tmprss13, Ccr9, Cldn1, Csprs, Wdr45, Gabarapl2, N28178, Carns1, Rnf144b, Ndrp2, Otub2, Cpeb4, D7Ert443e, Ace2, Gdpd1, Ppp1r1a, Peg3, Abhd14b, Ear1, Usp54, Islr, Alb, Lims2, Slc19a2, March3, Il6ra, Igfbp5, Rab3d, Plcx1, Tuft1, Ocln, Clic3, Fhdcl, Il1f9, Tmem65, Slc48a1, Tmem54, Bsdcl, Slc5a1, Slc5a8, Nipal1, Wdr65, Map3k9, Gm14137, Tcpl112, Pnpla1, Dsg1a, 2610206C17Rik, Pak3, Mapk13, Slc4a4, Znf41-ps, Tap1, Tmem184a, Decr2, Gm7609, Adamts12, Srgap2, Myoc, Angptl2, Gm16515, Ripk2, Mup11, Gabarapl1, Map3k8, Chp1, Spsb3, Slc25a42, Blmh, Tmem50b, Mmd, Smim14, Btbd3, Ptk6, Il22ra1, Wfdc5, Ahr, Crct1, Cyb5r4, St3gal5, Appl2, Fam57a, Adhfe1, Ceacam19, Fabp3, Smtnl2, Rnf39, Dgat2, Tmem254a, Ank, AA987161, Gbp8, Sbsn, Klif3, Elovl1, Adipor2, Klk5, Fabp3, Laptm4b, Pla2g2f, Cped1, Tec, Fgf18, Tmem140, Smpdl3a, Cldn23, Hspa12a, Slc35f5, Cmah, Frmd4b, Mup2, Cfd, Csprs, Ssfa2, Gstm2, Cd3g, Mreg, H2-K1, Rhb, Krt80, Tmem43, Adamts2, Dmkn, Defb6, Ech1, Npr2, Ljfr, Stk10, Gstk1, Scnn1a, Dapk1, Lmbrd1, Itih5, Nrep, Mfsd6, Slc37a1, Pcsk6, 2310002J15Rik, Dusp22, Slc22a23, Coll14a1, Arpc5, Vsig10l, Hr, Traf6, Fzd4, Krtap17-1, Prdm1, 2010109I03Rik, Gm94, Eps8l2, Mup1, Ggh, Tead1, Slc6a14, Dpep1, Acap2, Kif21a, Ubl7, Ly6g6c, Fchsd2, Mt4, Gbp4, Wfdc3, Csnk2a2, Ccdc80, Rnase6, Smpdl, Man1a, Chl1, Gas7, Serpina3c, Mup2, Aqp7, Zfp772, Dsc1, Cpt1a, Lama2, Enpep, Gm13177, Cd34, Ankrd44, Tprgl, Epcam, Tmem177, Pamr1, Mustn1, Sema4a, Ccl19, NA, Akr1c18, Hmcn1, Slc39a2, Ube4b, Cyb5r4, Add3, Lce3c, Asprv1, Rasgrp3, Pycard, Mapre2, Nlrc5, Gpx3, Slc7a10, Egl3, Slc26a7, 8430408G22Rik, Slc41a3, Dnajb9, Hmcn1, Ear1, Psen1, Zfp52, Gm2a, Gramd3, Gjb3, Mup2, Asah1, Dock11, Neu2, Gpsm1, Prss27, Lmbr11, Serinc3, Igfbp6, Ang, Hs3st6, Gstm4, Desi1, Hpse, Gstm5, Prkar2b, Cdsn, Serpina3h, Pglyrp4, Smap2, Cpa3, Pgr, Csrp3, Nrn1, Igsf10, Lmcd1, Slc46a1, Abcd2, Ear10, Lpl, 4930429B21Rik, Ghr, Ttpal, Krt84, Ppap2b, Kctd5, Cd82, Hspb1, Fam89a, Dnase113, Adamts11, sept-08, Cnfn, Nipal4, Palld, Plb1, March8, March2, Tlr11, Ltc4s, Itm2b, Plb1, Ctsa, Nt5c2, Sh3bgrl2, Cln8, Tmem40, Daglb, Chic2, Dusp14, Ndfip1, Ubl3, Klhl13, Hira3, Arsb, Ube2r2, Epn3, Mamdc2, Sh3kbp1, Rassf4, Agpat9, Sls, Hebp2, Cst3, Plin1, Bank1, Rnf208, Tpra1, Tmem50a, Btc, Spink5, Rnf223, Igsf10, Gsn, Kdelr3, Fcna, Timp2, Klif4, H2-T9, Lcele, Agtr1a, Lynx1, Fn1, 2310022B05Rik, Rps2, Tspan15, Olfr115, Cited4, Paqr8, Arsb, Ccdc120, Guk1, Tgm5, Hspb1, Ttc9, Gltp, Grhl3, Cpq, Sphk1, Lypd5, Gm13139, Micu1, Hmcn1, Ppif, Rab25, Ugeg, Kenk6, Scamp1, NA, Prcp, Nlrc5, Npas2, Slc45a4, Lipe, Pttglip, Cidec, Gstm1, Nlrc5, Gna15, Adipoq, Csprs, Mgl2, Nlrc5, Gng12, Socs2, Fxyd6, Npl, Lgalsl, Trex2, Sepp1, Pcolce, Fuca1, Cygb, Gas6, Cd7, Krtap3-2, Bnip3, Hmcn1, Lyz1, Slc43a2, Htral, Necap2, Pim1, Timd4, Pld3, Lsp1, Ctsk, Scamp2, Sparcl1, Anpep, Cd1d1, Thbs2, Man1c1, Gm9992, Sh3bp5, Man2b2, Gsta2, Steap3, Kctd11, Tapbp, Tmem141, Arrdc4, Mall, Retn, Mfsd5, Cd209g, Ldb2, Smoc1, Aph1b, Klb, Wfdc18, Mcu, Mapk3, Hexb, Ifi30, Dguok, Ctsh, Irak3, Pcdh1, Rgs18, Sncg, Arntl, Hmcn1, Cd209b, Lum, Dlc1, Gm13306, Hdac9, Pltp, Prkx, Ppp1r27, Slamf9, Nrtm, Tgfr2, Cbr2, Naaa, Cldn4, Cysltrl1, Trf, Cd209f, Mup2, Ngfr, Ebfl, Vgll3, Cercam, Dhrs9, Rgs7, Ubtdl1, Tgm1, Fbn1, Kctd12b, Tek, Ephx2, Fcrls, Rgs10, Serpinf1, Nov, Mmp2, Ctso, Scg3, Igsf10, H2-T10, Dpt, Sh3bgrl, Chst15, Plekha2, Gpr133, Rnf11, Pmp22, Klk7, Mal2, Cd248, Kctd12,*

*Tmeff2, Rab11fip1, Scn7a, Klk8, Nlrc5, Gypc, Mrgprb1, Man2b1, Sprr1a, Greb1, Plk3, Dok2, Cd209c, Scara3, Ctgf, Ipkb, Camk2n1, Gm11564, H2-M3, Mmp11, Col15a1, Atp6v0d1, Fcgrt, Prkcb, Arrb1, Glrx, Il1a, Hmcn1, Pnp2, H2-Q4, Irgm2, Prex2, Tm6sf1, Mnf1, Pla2g2d, Ifi203, Chac1, Sgce, Gng4, Psmb9, Ctst, Prss23, Abcg1, Tcn2, Irak2, Aoah, Tbxas1, Dcn, Car6, Iigp1b, Csf1r, Ccl19, Ly6d, Serping1, Ndn, Plod2, Wisp2, C3, Plac9a, Fabp4, Reln, Cd209a, Cmkrl1, Hsd17b11, Calcrl, Nid1, Laptm5, Cmtm3, Cybb, Dkk2, Mxra8, Loxl1, Serpina3f, Colec12, Sprr4, Tgm2, Pi16, Fstl1, Cd163, Gbp6, Degs2, Abtb2, Dpysl3, Lox, Gm4951, Loxl2, Krtap5-1, Slc5a3, Spon1, Stard8, Tgtp1, Slc43a3, Ecm1, Itga4, 9930111J21Rik2, Gbp7, Pxdn, Sp100, Irgm1, Blvrb, Igfbp3, Defb1, Mcpt4, Ccl19, Gbp9, Mxd1, Cdh11, Cls, Klk10, Clqtnf1, Vsig4, Tgtp1, Igf1, Plb1, Il1r2, Opct, Cfhr2, Gm5431, Lpgat1, Psmb10, Ddx60, Gm10639, Cd37, Rhoj, Krtap5-4, AI607873, AW551984, Ntrk2, Gfpt2, Gatm, Cfh, Lyz2, Rac2, Ly6g6e, Alox5, Clqa, Svep1, Rassf2, F13a1, Fam26e, Dock2, Dab2, Ndr1, Cd48, Pgm1, Plac9a, Ptplad2, Gbgt1, Lgals3bp, Tlr7, Xist, Krtap1-3, Mrc1, Pld4, Clqc, Tshr, Sfrp2, Anxa3, Gbp2, Krtap4-13, Ms4a8a, Efemp1, Clrb, Gvin1, Emr1, Ggt5, Gpc3, Emp3, Ube2l6, Cyp1b1, Folr2, Slc16a12, Unc93b1, Clqb, Siglec1, Tpsb2, Pla1a, Lbp, Sdc3, Mest, Ednrb, Nrpl, Sfrp4, Mfap5, Osr1, Fcgr2b, Cd68, Selplg, Clra, Krtap9-3, Iigp1, Cfp, Trim30a, Gabra3, Ly86, Lyve1, Krtap4-7, Fcer1g, Cd209e, Ccl21a, Gabrp, Oasl2, Ifi205, Mmrn1, Pf4, Fcgr3, AW112010, Ccl8, Krtap4-2, Sod3, Gsta1, P2ry13, Pinlyp, Krtap2-4, Krtap9-1, Chrll1, Cd209d, Ifit3, Gm12250, Clec10a, Lcp1, Snord118, Nnmt, Ccl11, Krtap4-13, Gm11563, Krtap4-6, Cd38, Krtap2-4, Cp, Alox5ap, Angptl4, Wfdc17, Lep, Plac8, Ccl6, Krtap4-1, Krtap1-5, Gm11567, Ccl9, Gm10228, Mup7, Krtap21-1, Krtap4-16, Ifitm6, Krtap6-2, Krtap6-5, Krtap6-1, Cxcl13, Prr9, Krtap7-1*

SUPPLEMENTARY TABLE 3. List of genes belonging to the Vav2<sup>Onc</sup>-Sig.

| GENE SYMBOL     | PATTERN IN Vav2 <sup>Onc</sup> | PATTERN IN Vav2 <sup>-/-</sup> ;Vav3 <sup>-/-</sup> + TPA | PATTERN IN cSCC | PATTERN IN ORAL SCC |
|-----------------|--------------------------------|-----------------------------------------------------------|-----------------|---------------------|
| <i>AREG</i>     | up                             | down                                                      | up              | up                  |
| <i>AURKA</i>    | up                             | down                                                      | up              | up                  |
| <i>AURKB</i>    | up                             | down                                                      | up              | up                  |
| <i>BCAT1</i>    | up                             | down                                                      | up              | up                  |
| <i>BIRC5</i>    | up                             | down                                                      | up              | up                  |
| <i>BNC1</i>     | up                             | down                                                      | up              | up                  |
| <i>CCL4</i>     | up                             | down                                                      | up              | up                  |
| <i>CCT5</i>     | up                             | down                                                      | up              | up                  |
| <i>CDC20</i>    | up                             | down                                                      | up              | up                  |
| <i>CDCA5</i>    | up                             | down                                                      | up              | up                  |
| <i>CDCA8</i>    | up                             | down                                                      | up              | up                  |
| <i>CDK1</i>     | up                             | down                                                      | up              | up                  |
| <i>CENPN</i>    | up                             | down                                                      | up              | up                  |
| <i>CKS1B</i>    | up                             | down                                                      | up              | up                  |
| <i>CKS2</i>     | up                             | down                                                      | up              | up                  |
| <i>CXCL2</i>    | up                             | down                                                      | up              | up                  |
| <i>E2F7</i>     | up                             | down                                                      | up              | up                  |
| <i>ENAH</i>     | up                             | down                                                      | up              | up                  |
| <i>FEN1</i>     | up                             | down                                                      | up              | up                  |
| <i>FOSL1</i>    | up                             | down                                                      | up              | up                  |
| <i>FSCN1</i>    | up                             | down                                                      | up              | up                  |
| <i>HAS3</i>     | up                             | down                                                      | up              | up                  |
| <i>HMGB3</i>    | up                             | down                                                      | up              | up                  |
| <i>IFITM1</i>   | up                             | down                                                      | up              | up                  |
| <i>IL1B</i>     | up                             | down                                                      | up              | up                  |
| <i>IL24</i>     | up                             | down                                                      | up              | up                  |
| <i>INHBA</i>    | up                             | down                                                      | up              | up                  |
| <i>ITGB1</i>    | up                             | down                                                      | up              | up                  |
| <i>KPNA2</i>    | up                             | down                                                      | up              | up                  |
| <i>LAMC2</i>    | up                             | down                                                      | up              | up                  |
| <i>LIPG</i>     | up                             | down                                                      | up              | up                  |
| <i>LRP8</i>     | up                             | down                                                      | up              | up                  |
| <i>MCM10</i>    | up                             | down                                                      | up              | up                  |
| <i>MMP13</i>    | up                             | down                                                      | up              | up                  |
| <i>MMP9</i>     | up                             | down                                                      | up              | up                  |
| <i>MTHFD2</i>   | up                             | down                                                      | up              | up                  |
| <i>MYC</i>      | up                             | down                                                      | up              | up                  |
| <i>NDC80</i>    | up                             | down                                                      | up              | up                  |
| <i>NEK2</i>     | up                             | down                                                      | up              | up                  |
| <i>NOLC1</i>    | up                             | down                                                      | up              | up                  |
| <i>NRG1</i>     | up                             | down                                                      | up              | up                  |
| <i>NRP2</i>     | up                             | down                                                      | up              | up                  |
| <i>ODC1</i>     | up                             | down                                                      | up              | up                  |
| <i>PDPN</i>     | up                             | down                                                      | up              | up                  |
| <i>PII5</i>     | up                             | down                                                      | up              | up                  |
| <i>PLAUR</i>    | up                             | down                                                      | up              | up                  |
| <i>PLEK</i>     | up                             | down                                                      | up              | up                  |
| <i>PTGS2</i>    | up                             | down                                                      | up              | up                  |
| <i>RAD51API</i> | up                             | down                                                      | up              | up                  |
| <i>RANBP1</i>   | up                             | down                                                      | up              | up                  |

| GENE SYMBOL     | PATTERN IN <i>Vav2</i> <sup>0nc</sup> | PATTERN IN <i>Vav2</i> <sup>-/-</sup> ; <i>Vav3</i> <sup>-/-</sup> + TPA | PATTERN IN cSCC | PATTERN IN ORAL SCC |
|-----------------|---------------------------------------|--------------------------------------------------------------------------|-----------------|---------------------|
| <i>RRM2</i>     | up                                    | down                                                                     | up              | up                  |
| <i>SERPINE1</i> | up                                    | down                                                                     | up              | up                  |
| <i>SH2D5</i>    | up                                    | down                                                                     | up              | up                  |
| <i>SLC20A1</i>  | up                                    | down                                                                     | up              | up                  |
| <i>SLC2A3</i>   | up                                    | down                                                                     | up              | up                  |
| <i>SLC7A11</i>  | up                                    | down                                                                     | up              | up                  |
| <i>SLC7A5</i>   | up                                    | down                                                                     | up              | up                  |
| <i>SOCS3</i>    | up                                    | down                                                                     | up              | up                  |
| <i>SPP1</i>     | up                                    | down                                                                     | up              | up                  |
| <i>SRM</i>      | up                                    | down                                                                     | up              | up                  |
| <i>STOM</i>     | up                                    | down                                                                     | up              | up                  |
| <i>TK1</i>      | up                                    | down                                                                     | up              | up                  |
| <i>TNC</i>      | up                                    | down                                                                     | up              | up                  |
| <i>TREM1</i>    | up                                    | down                                                                     | up              | up                  |
| <i>TRIP13</i>   | up                                    | down                                                                     | up              | up                  |
| <i>UBE2S</i>    | up                                    | down                                                                     | up              | up                  |
| <i>ABCA5</i>    | down                                  | up                                                                       | down            | down                |
| <i>ABCA6</i>    | down                                  | up                                                                       | down            | down                |
| <i>ABCA9</i>    | down                                  | up                                                                       | down            | down                |
| <i>ACPP</i>     | down                                  | up                                                                       | down            | down                |
| <i>ADSSL1</i>   | down                                  | up                                                                       | down            | down                |
| <i>AFF3</i>     | down                                  | up                                                                       | down            | down                |
| <i>ALDH1A1</i>  | down                                  | up                                                                       | down            | down                |
| <i>ANKRD35</i>  | down                                  | up                                                                       | down            | down                |
| <i>ANXA9</i>    | down                                  | up                                                                       | down            | down                |
| <i>AR</i>       | down                                  | up                                                                       | down            | down                |
| <i>ARHGAP20</i> | down                                  | up                                                                       | down            | down                |
| <i>ATP12A</i>   | down                                  | up                                                                       | down            | down                |
| <i>ATP1A2</i>   | down                                  | up                                                                       | down            | down                |
| <i>ATP1B1</i>   | down                                  | up                                                                       | down            | down                |
| <i>BBOX1</i>    | down                                  | up                                                                       | down            | down                |
| <i>CAMK1D</i>   | down                                  | up                                                                       | down            | down                |
| <i>CARD14</i>   | down                                  | up                                                                       | down            | down                |
| <i>CDO1</i>     | down                                  | up                                                                       | down            | down                |
| <i>CDON</i>     | down                                  | up                                                                       | down            | down                |
| <i>CGN</i>      | down                                  | up                                                                       | down            | down                |
| <i>CILP</i>     | down                                  | up                                                                       | down            | down                |
| <i>COBL</i>     | down                                  | up                                                                       | down            | down                |
| <i>CUL3</i>     | down                                  | up                                                                       | down            | down                |
| <i>DLG2</i>     | down                                  | up                                                                       | down            | down                |
| <i>EXPH5</i>    | down                                  | up                                                                       | down            | down                |
| <i>FAM189A2</i> | down                                  | up                                                                       | down            | down                |
| <i>FAM3B</i>    | down                                  | up                                                                       | down            | down                |
| <i>FMO2</i>     | down                                  | up                                                                       | down            | down                |
| <i>FXYD1</i>    | down                                  | up                                                                       | down            | down                |
| <i>FYCO1</i>    | down                                  | up                                                                       | down            | down                |
| <i>GAN</i>      | down                                  | up                                                                       | down            | down                |
| <i>GRAMD1C</i>  | down                                  | up                                                                       | down            | down                |
| <i>HMGCS2</i>   | down                                  | up                                                                       | down            | down                |
| <i>HSPB6</i>    | down                                  | up                                                                       | down            | down                |
| <i>IL18</i>     | down                                  | up                                                                       | down            | down                |
| <i>IL20RA</i>   | down                                  | up                                                                       | down            | down                |

| <b>GENE SYMBOL</b> | <b>PATTERN IN <i>Vav2</i><sup>0nc</sup></b> | <b>PATTERN IN <i>Vav2</i><sup>-/-</sup>;<i>Vav3</i><sup>-/-</sup> + TPA</b> | <b>PATTERN IN cSCC</b> | <b>PATTERN IN ORAL SCC</b> |
|--------------------|---------------------------------------------|-----------------------------------------------------------------------------|------------------------|----------------------------|
| <i>INMT</i>        | down                                        | up                                                                          | down                   | down                       |
| <i>ITM2A</i>       | down                                        | up                                                                          | down                   | down                       |
| <i>KRT15</i>       | down                                        | up                                                                          | down                   | down                       |
| <i>LDB3</i>        | down                                        | up                                                                          | down                   | down                       |
| <i>LNXI</i>        | down                                        | up                                                                          | down                   | down                       |
| <i>LRRN4CL</i>     | down                                        | up                                                                          | down                   | down                       |
| <i>MAOB</i>        | down                                        | up                                                                          | down                   | down                       |
| <i>MBOAT2</i>      | down                                        | up                                                                          | down                   | down                       |
| <i>MFAP4</i>       | down                                        | up                                                                          | down                   | down                       |
| <i>MYOZ1</i>       | down                                        | up                                                                          | down                   | down                       |
| <i>NEBL</i>        | down                                        | up                                                                          | down                   | down                       |
| <i>OGN</i>         | down                                        | up                                                                          | down                   | down                       |
| <i>PCOLCE2</i>     | down                                        | up                                                                          | down                   | down                       |
| <i>PKIA</i>        | down                                        | up                                                                          | down                   | down                       |
| <i>PKIB</i>        | down                                        | up                                                                          | down                   | down                       |
| <i>POF1B</i>       | down                                        | up                                                                          | down                   | down                       |
| <i>PYGM</i>        | down                                        | up                                                                          | down                   | down                       |
| <i>RECK</i>        | down                                        | up                                                                          | down                   | down                       |
| <i>RORA</i>        | down                                        | up                                                                          | down                   | down                       |
| <i>SCARA5</i>      | down                                        | up                                                                          | down                   | down                       |
| <i>SCEL</i>        | down                                        | up                                                                          | down                   | down                       |
| <i>SH3RF2</i>      | down                                        | up                                                                          | down                   | down                       |
| <i>SLC16A14</i>    | down                                        | up                                                                          | down                   | down                       |
| <i>SLC24A3</i>     | down                                        | up                                                                          | down                   | down                       |
| <i>SLC2A12</i>     | down                                        | up                                                                          | down                   | down                       |
| <i>SLC6A4</i>      | down                                        | up                                                                          | down                   | down                       |
| <i>SLURP1</i>      | down                                        | up                                                                          | down                   | down                       |
| <i>SOX6</i>        | down                                        | up                                                                          | down                   | down                       |
| <i>SSBP2</i>       | down                                        | up                                                                          | down                   | down                       |
| <i>TCEA3</i>       | down                                        | up                                                                          | down                   | down                       |
| <i>TJP3</i>        | down                                        | up                                                                          | down                   | down                       |
| <i>TPPP</i>        | down                                        | up                                                                          | down                   | down                       |
| <i>TPPP3</i>       | down                                        | up                                                                          | down                   | down                       |
| <i>TRIM7</i>       | down                                        | up                                                                          | down                   | down                       |

SUPPLEMENTARY TABLE 4. List of genes belonging to the minimal *Vav2*<sup>Onc</sup> diagnostic gene signature

| GENE SYMBOL     | PATTERN IN <i>Vav2</i> <sup>Onc</sup> | PATTERN IN <i>Vav2</i> <sup>-/-</sup> ; <i>Vav3</i> <sup>-/-</sup> + TPA | PATTERN IN cSCC | PATTERN IN ORAL SCC |
|-----------------|---------------------------------------|--------------------------------------------------------------------------|-----------------|---------------------|
| <i>AREG</i>     | up                                    | down                                                                     | up              | up                  |
| <i>AURKA</i>    | up                                    | down                                                                     | up              | up                  |
| <i>BCAT1</i>    | up                                    | down                                                                     | up              | up                  |
| <i>BIRC5</i>    | up                                    | down                                                                     | up              | up                  |
| <i>CCL4</i>     | up                                    | down                                                                     | up              | up                  |
| <i>CDC45</i>    | up                                    | down                                                                     | up              | up                  |
| <i>CDC48</i>    | up                                    | down                                                                     | up              | up                  |
| <i>CKS1B</i>    | up                                    | down                                                                     | up              | up                  |
| <i>CXCL2</i>    | up                                    | down                                                                     | up              | up                  |
| <i>FSCN1</i>    | up                                    | down                                                                     | up              | up                  |
| <i>HAS3</i>     | up                                    | down                                                                     | up              | up                  |
| <i>IL24</i>     | up                                    | down                                                                     | up              | up                  |
| <i>LAMC2</i>    | up                                    | down                                                                     | up              | up                  |
| <i>MMP9</i>     | up                                    | down                                                                     | up              | up                  |
| <i>MYC</i>      | up                                    | down                                                                     | up              | up                  |
| <i>NEK2</i>     | up                                    | down                                                                     | up              | up                  |
| <i>NOLC1</i>    | up                                    | down                                                                     | up              | up                  |
| <i>ODC1</i>     | up                                    | down                                                                     | up              | up                  |
| <i>SERPINE1</i> | up                                    | down                                                                     | up              | up                  |
| <i>SLC20A1</i>  | up                                    | down                                                                     | up              | up                  |
| <i>SLC2A3</i>   | up                                    | down                                                                     | up              | up                  |
| <i>SLC7A11</i>  | up                                    | down                                                                     | up              | up                  |
| <i>SLC7A5</i>   | up                                    | down                                                                     | up              | up                  |
| <i>SOCS3</i>    | up                                    | down                                                                     | up              | up                  |
| <i>SRM</i>      | up                                    | down                                                                     | up              | up                  |
| <i>ABCA9</i>    | down                                  | up                                                                       | down            | down                |
| <i>ACPP</i>     | down                                  | up                                                                       | down            | down                |
| <i>ANXA9</i>    | down                                  | up                                                                       | down            | down                |
| <i>ARHGAP20</i> | down                                  | up                                                                       | down            | down                |
| <i>ATP1A2</i>   | down                                  | up                                                                       | down            | down                |
| <i>CAMK1D</i>   | down                                  | up                                                                       | down            | down                |
| <i>CILP</i>     | down                                  | up                                                                       | down            | down                |
| <i>EXPH5</i>    | down                                  | up                                                                       | down            | down                |
| <i>FYCO1</i>    | down                                  | up                                                                       | down            | down                |
| <i>HSPB6</i>    | down                                  | up                                                                       | down            | down                |
| <i>PKIB</i>     | down                                  | up                                                                       | down            | down                |
| <i>PYGM</i>     | down                                  | up                                                                       | down            | down                |
| <i>SCEL</i>     | down                                  | up                                                                       | down            | down                |
| <i>SLC6A4</i>   | down                                  | up                                                                       | down            | down                |
| <i>SSBP2</i>    | down                                  | up                                                                       | down            | down                |
| <i>TCEA3</i>    | down                                  | up                                                                       | down            | down                |



SUPPLEMENTARY TABLE 5. List of patient samples used in this study

| SAMPLE ID | SAMPLE TYPE | SOURCE                                  |
|-----------|-------------|-----------------------------------------|
| B87       | Healthy     | University Central Hospital of Asturias |
| B100      | Healthy     | University Central Hospital of Asturias |
| B103      | Healthy     | University Central Hospital of Asturias |
| B107      | Healthy     | University Central Hospital of Asturias |
| B116      | Healthy     | University Central Hospital of Asturias |
| B135      | Healthy     | University Central Hospital of Asturias |
| B140      | Healthy     | University Central Hospital of Asturias |
| B141      | Healthy     | University Central Hospital of Asturias |
| B143      | Healthy     | University Central Hospital of Asturias |
| B147      | Healthy     | University Central Hospital of Asturias |
| B158      | Healthy     | University Central Hospital of Asturias |
| B161      | Healthy     | University Central Hospital of Asturias |
| B169      | Healthy     | University Central Hospital of Asturias |
| B172      | Healthy     | University Central Hospital of Asturias |
| B174      | Healthy     | University Central Hospital of Asturias |
| B175      | Healthy     | University Central Hospital of Asturias |
| B183      | Healthy     | University Central Hospital of Asturias |
| T87       | hnSCC       | University Central Hospital of Asturias |
| T91       | hnSCC       | University Central Hospital of Asturias |
| T92       | hnSCC       | University Central Hospital of Asturias |
| T97       | hnSCC       | University Central Hospital of Asturias |
| T98       | hnSCC       | University Central Hospital of Asturias |
| TL100     | hnSCC       | University Central Hospital of Asturias |
| TP100     | hnSCC       | University Central Hospital of Asturias |
| T103      | hnSCC       | University Central Hospital of Asturias |
| T104      | hnSCC       | University Central Hospital of Asturias |
| T106      | hnSCC       | University Central Hospital of Asturias |
| T107      | hnSCC       | University Central Hospital of Asturias |
| T108      | hnSCC       | University Central Hospital of Asturias |
| T109      | hnSCC       | University Central Hospital of Asturias |
| T112      | hnSCC       | University Central Hospital of Asturias |
| T116      | hnSCC       | University Central Hospital of Asturias |
| T119      | hnSCC       | University Central Hospital of Asturias |
| T129      | hnSCC       | University Central Hospital of Asturias |
| T133      | hnSCC       | University Central Hospital of Asturias |
| T135      | hnSCC       | University Central Hospital of Asturias |
| T140      | hnSCC       | University Central Hospital of Asturias |
| T141      | hnSCC       | University Central Hospital of Asturias |
| T143      | hnSCC       | University Central Hospital of Asturias |
| T147      | hnSCC       | University Central Hospital of Asturias |
| T151      | hnSCC       | University Central Hospital of Asturias |
| T155      | hnSCC       | University Central Hospital of Asturias |
| T158      | hnSCC       | University Central Hospital of Asturias |
| T161      | hnSCC       | University Central Hospital of Asturias |
| T168      | hnSCC       | University Central Hospital of Asturias |

| SAMPLE ID | SAMPLE TYPE | SOURCE                                  |
|-----------|-------------|-----------------------------------------|
| T169      | hnSCC       | University Central Hospital of Asturias |
| T172      | hnSCC       | University Central Hospital of Asturias |
| T174      | hnSCC       | University Central Hospital of Asturias |
| T175      | hnSCC       | University Central Hospital of Asturias |
| T183      | hnSCC       | University Central Hospital of Asturias |
| S12       | Healthy     | Sant Pau i Santa Creu Hospital          |
| S139      | Healthy     | Sant Pau i Santa Creu Hospital          |
| S463      | Healthy     | Sant Pau i Santa Creu Hospital          |
| S524      | Healthy     | Sant Pau i Santa Creu Hospital          |
| S542      | Healthy     | Sant Pau i Santa Creu Hospital          |
| S548      | Healthy     | Sant Pau i Santa Creu Hospital          |
| S564      | Healthy     | Sant Pau i Santa Creu Hospital          |
| S568      | Healthy     | Sant Pau i Santa Creu Hospital          |
| S743      | Healthy     | Sant Pau i Santa Creu Hospital          |
| S1039     | Healthy     | Sant Pau i Santa Creu Hospital          |
| T11       | hnSCC       | Sant Pau i Santa Creu Hospital          |
| T138      | hnSCC       | Sant Pau i Santa Creu Hospital          |
| T289      | hnSCC       | Sant Pau i Santa Creu Hospital          |
| T306      | hnSCC       | Sant Pau i Santa Creu Hospital          |
| T334      | hnSCC       | Sant Pau i Santa Creu Hospital          |
| T462      | hnSCC       | Sant Pau i Santa Creu Hospital          |
| T523      | hnSCC       | Sant Pau i Santa Creu Hospital          |
| T541      | hnSCC       | Sant Pau i Santa Creu Hospital          |
| T547      | hnSCC       | Sant Pau i Santa Creu Hospital          |
| T563      | hnSCC       | Sant Pau i Santa Creu Hospital          |
| T567      | hnSCC       | Sant Pau i Santa Creu Hospital          |
| T742      | hnSCC       | Sant Pau i Santa Creu Hospital          |
| T1038     | hnSCC       | Sant Pau i Santa Creu Hospital          |
| T27598    | hnSCC       | University Hospital of Salamanca        |
| T27629    | hnSCC       | University Hospital of Salamanca        |
| T27767    | hnSCC       | University Hospital of Salamanca        |
| T27824    | hnSCC       | University Hospital of Salamanca        |
| T28160    | hnSCC       | University Hospital of Salamanca        |
| T28252    | hnSCC       | University Hospital of Salamanca        |
| T28288    | hnSCC       | University Hospital of Salamanca        |
| T29277    | hnSCC       | University Hospital of Salamanca        |
| T29331    | hnSCC       | University Hospital of Salamanca        |
| T29894    | hnSCC       | University Hospital of Salamanca        |

### SUPPLEMENTARY NOTE 1. Genomic characterization of the hnSCC patient-derived cells used in this study

Using next generation sequencing (see Methods), we found that the VdH01 and VdH015 patient-derived cells are clearly different according to the catalogue of both deleterious single nucleotide (**Supplementary Fig. 6a**) and copy number (**Supplementary Fig. 6b,c**) variations present in them. These disparities are expected, given that each of those cells has been obtained from an independent patient. The two patient-derived cells share, however, alterations that target common loci (*APOBEC3B*, *AXIN1*, *BCOR*, *CASP8*, *CREBBP*, *DDX3X*, *EP300*, *FAT1*, *FHIT*, *GRIN2A*, *MRTFA*, *MYH9*, *NTHL1*, *ROBO2*, *TP53*, *TRAF7*, *TSC2*, *ZRSR29*) (**Supplementary Fig. 6a-c**). Mutations in *FAT1*, *TP53*, and *ROBO2* are also present in the SCC-25 cancer cell line (**Supplementary Fig. 6a-c**). The two patient-derived cells are also HPV<sup>-</sup> (**Fig. 6a**) and show a gain in the long arm of chromosome 9, a frequent event in hnSCC from oral regions<sup>1,2</sup>. Many of the genetic alterations found in each of those patient-derived cells have been previously detected at high frequency rates in hnSCC cases (*CASP8*, *CDKN2A*, *EP300*, *FAT1*, *NOTCH1*, *MYC*, *PABPC1*, *RAD21*, *RECQL4*, *TERT*, *SPEN*, *TP53*) (**Supplementary Fig. 6a-d**). In the case of *VAV2*, we did not find any activating single point mutation in any of the two patient-derived cells (**Supplementary Fig. 6a**). The VdH15 cells do bear a small deletion of 1,068 bp in a region downstream of the *VAV2* locus that harbors a putative binding site for the transcriptional factor ZNF263 (**Supplementary Fig. 6e**; coordinates chr9:136625194-136626262), although the functional relevance of this alteration for either *VAV2* expression or hnSCC etiology is unknown. Interestingly, we found a point mutation in *VAV1* (Q122R) in VdH01 patient-derived cells. An analogous mutation (Q122H) has been found before in a cervical SCC case in TCGA studies. These mutations, however, are unlikely to create a catalytic gain-of-function event on the protein according to previous functional and structural studies<sup>3,4</sup>. The VdH01 cells also show amplification events affecting *PREX2* and *ARHGAP5*, two loci encoding a RAC1 GEF and RHOA GTPase activating protein, respectively. Although paradoxical from a functional point of view, the amplification of the latter gene has been observed before in a number of tumors<sup>5</sup>.

**SUPPLEMENTARY REFERENCES**

1. Martín, C.L. *et al.* Chromosomal imbalances in oral squamous cell carcinoma: examination of 31 cell lines and review of the literature. *Oral Oncol* **44**, 369-382 (2008).
2. Pickering, C.R. *et al.* Integrative genomic characterization of oral squamous cell carcinoma identifies frequent somatic drivers. *Cancer Discov* **3**, 770-781 (2013).
3. Llorca, O., Arias-Palomo, E., Zugaza, J.L. & Bustelo, X.R. Global conformational rearrangements during the activation of the GDP/GTP exchange factor Vav3. *EMBO J* **24**, 1330-1340 (2005).
4. Yu, B. *et al.* Structural and energetic mechanisms of cooperative autoinhibition and activation of Vav1. *Cell* **140**, 246-256 (2010).
5. Héraud, C., Pinault, M., Lagrée, V. & Moreau, V. The p190RhoGAPs. *Cells* **8** (2019).
