# Supplementary material for: VAV2 signaling promotes regenerative proliferation in both cutaneous and head and neck squamous cell carcinoma
Source: PubMed Central journal article supplement (PMC7508832; doi:10.1038/s41467-020-18524-3), 2020-09-22
Supplement: 41467_2020_18524_MOESM3_ESM.pdf [file 41467_2020_18524_MOESM3_ESM.pdf]

## **Description of Additional Supplementary Files**

File Name: Supplementary Data 1

Description: List of genes belonging to the Vav2Onc-regulated transcriptome.
